# Supplementary material
Source: Springer Nature journal article supplement (https://www.springermedizin.de/resource/supplementary/12881_2012_1034_MOESM2_ESM.pdf/9451564)

\*  $P < 0.05$       ■ Non stimulated  
\*\*  $P < 0.0005$     ■ Stimulated

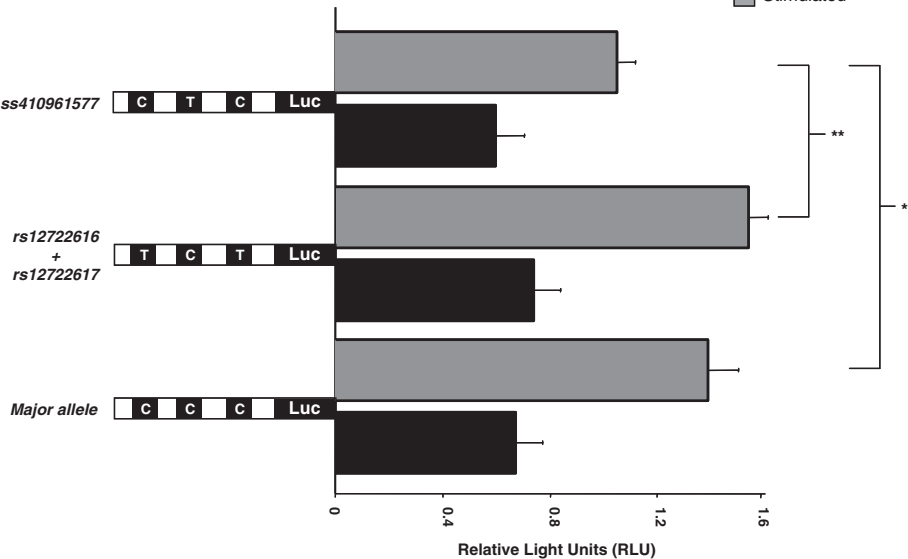

Supplement: MOESM2 [file 9451564]
